# Supplementary material for: Year-Long Microbial Succession on Microplastics in Wastewater: Chaotic Dynamics Outweigh Preferential Growth
Source: MDPI journal article supplement (doi:10.3390/microorganisms10091775), 2022-09-02
Supplement: s1 [file s1]

# Year-Long Microbial Succession on Microplastics in Wastewater: Chaotic Dynamics Outweigh Preferential Growth

Alexander S. Tagg <sup>1,2,\*</sup>, Theodor Sperlea <sup>1</sup>, Matthias Labrenz <sup>1</sup>, Jesse P. Harrison <sup>3</sup>, Jesús J. Ojeda <sup>2</sup> and Melanie Sapp <sup>4</sup>

<sup>1</sup> Leibniz-Institut für Ostseeforschung Warnemünde, Seestraße 15, 18119 Rostock, Germany

<sup>2</sup> Department of Chemical Engineering, Faculty of Science and Engineering, Swansea University, Swansea SA1 8EN, UK

<sup>3</sup> CSC—IT Center for Science Ltd., P.O. Box 405, FI-02101 Espoo, Finland

<sup>4</sup> Institute of Human Genetics, University Hospital Düsseldorf, Heinrich Heine University, Moorenstrasse 5, 40225 Düsseldorf, Germany

\* Correspondence: alexandertagg@gmail.com

## Experimental Section

### *Microplastic Information*

The microplastic types studied were PE (Goodfellow Ltd, Cambridge, UK), PP (Shawingigan Ltd, London, UK),<sup>[1]</sup> PVC (Cellomer Associates inc., New York, USA),<sup>[2]</sup> nylon-6 (Koch-Light Laboratories Ltd, Colnbrook, UK) and trimmed PET fragments obtained from a commercial mineral water bottle (Costcutter Montgomery Q4 Natural Water, Uxbridge, UK). With the exception of PET, all microplastics were ~1.

### *Microplastic Extraction from Microcosm Tubes*

Larger microplastics (e.g. PET) and large glass beads were removed at each sampling interval using a small spatula. Smaller microplastics (150–250 µm) were extracted by multiple pipetting and rinsing with sterilised ultra-high quality [UHQ] water. This was repeated 3–6 times until no more biogenic organic matter (BOM) could be observed. In a final step all microplastics were drawn into a 250-µL pipette tip and the remaining liquid was absorbed using sterilised tissue paper (VWR, Germany). The outside of the tip was cleaned with 80% (v/v) ethanol (VWR, Germany) and the retained microplastics were stored in 1 ml of UHQ water at 4 °C until all samples were ready for DNA extraction. All microplastic extraction work was undertaken in a laminar flow cabinet to avoid contamination from the air.

For microplastics which would form a pellet by centrifugation, samples were centrifuged (up to 2038× g) for 2 minutes before being extracted from storage suspension. The sample was placed on clean, water resistant laboratory film (Parafilm MTM, Sigma Aldrich, USA) and the remaining suspension liquid was removed using a fine 2 µL pipette tip (see Appendix B; Figure B1). For PE and PP, which could not be centrifuged, a 1 µL inoculation loop was used to transfer microplastics from storage suspension directly to the extraction tube. For the extraction of larger size microplastics like PET and large glass beads (~1–2 mm) sterile fine tweezers were used for transfer. Glass microbeads were transferred to extraction tubes using a 20 µL pipette tip without ejecting any of the suspension fluid.

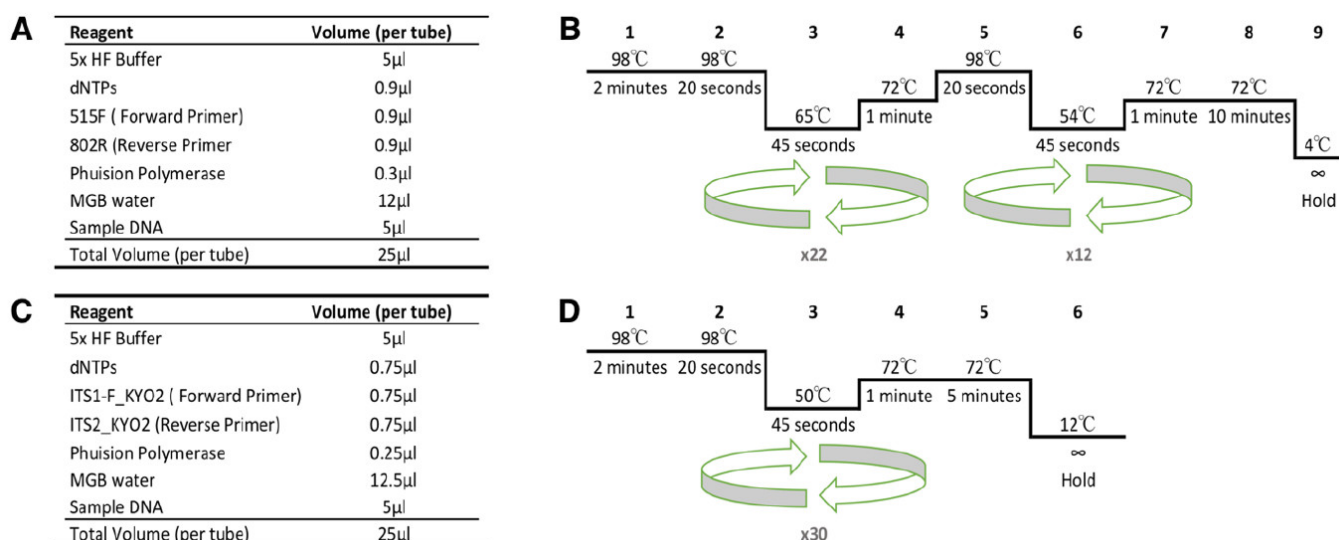

**Figure S1.** Experimental details of amplicon PCRs. (A): Amplicon PCR mix for 16S. (B): Amplicon PCR run protocol for 16S. (C): Amplicon PCR mix for ITS. (D): Amplicon PCR run protocol for ITS.

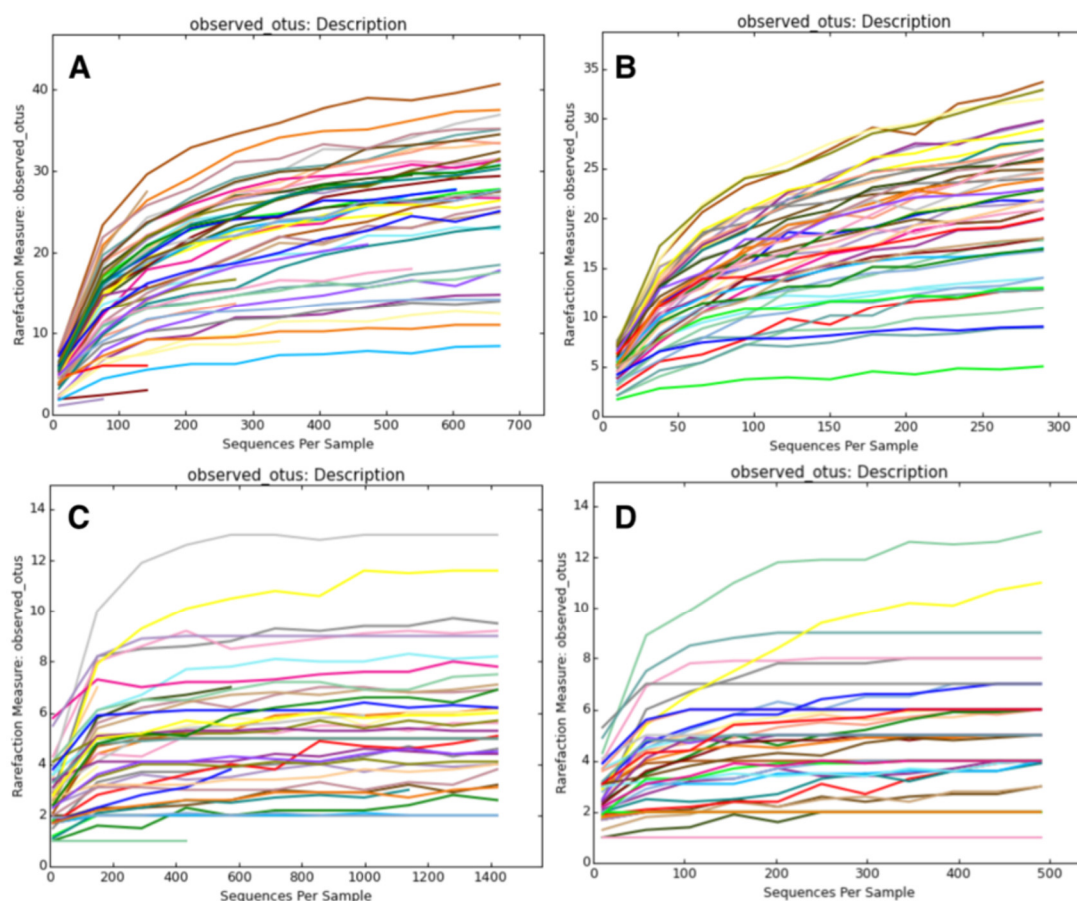

**Figure S2.** Rarefaction curves based on OTU richness. A: 16S before rarefaction; B: 16S after rarefaction at 297 sequences per sample; C: ITS before rarefaction; D: ITS after rarefaction at 499 sequences per sample.

**Table S1.** National Centre for Biotechnology Information (NCBI) Basic Local Alignment Search Tool (BLAST) best matches for 16S OTUs. See main text for full references.

| OTU ID | UTAX Taxonomy                                    | BLAST “Best Hit” Taxonomy                      | BLAST Score | BLAST Similarity (%) | “Best Hit” Reference (If Available) | “Best Hit” Genbank ID |
|--------|--------------------------------------------------|------------------------------------------------|-------------|----------------------|-------------------------------------|-----------------------|
| OTU 3  | <i>Pseudomonas</i> sp.                           | <i>Pseudomonas</i> sp.                         | 468         | 100                  | Hamm et al., 2017 [78]              | KX928315              |
| OTU 7  | <i>Rhodanobacter</i> A                           | <i>Rhodanobacter thiooxydans</i>               | 468         | 100                  | Thijs et al., 2014 [79]             | HG794331              |
| OTU 8  | <i>Armatimonas</i> Gp1                           | Uncultured bacterium                           | 470         | 100                  | Unpublished                         | KU113498              |
| OTU 10 | <i>Sphingomonas</i>                              | <i>Sphingomonas</i> sp.                        | 468         | 100                  | Colin et al., 2017 [80]             | KX419227              |
| OTU 11 | <i>Corynebacterineae</i>                         | <i>Rhodococcus erythropolis</i>                | 468         | 100                  | Mikolasch et al., 2016 [81]         | KU663058              |
| OTU 12 | <i>Mucilaginibacter</i> A                        | <i>Mucilaginibacter</i> sp.                    | 468         | 100                  | Unpublished                         | EU423305              |
| OTU 14 | <i>Geothrix</i>                                  | Uncultured bacterium                           | 468         | 100                  | Rodrigues et al., 2010 [82]         | GU169059              |
| OTU 15 | <i>Dokdonella</i>                                | Uncultured bacterium                           | 468         | 100                  | Unpublished                         | KU316012              |
| OTU 16 | <i>Thiobacillus</i>                              | Uncultured <i>Thiobacillus</i>                 | 468         | 100                  | Suzuki et al., 2016 [83]            | LC070284              |
| OTU 17 | <i>Mucilaginibacter</i> B                        | Uncultured <i>Bacteroidetes</i>                | 468         | 100                  | Zinger et al., 2009 [84]            | FJ569393              |
| OTU 18 | <i>Rhodanobacter</i> B                           | Uncultured bacterium                           | 468         | 100                  | Zeglin et al., 2016 [85]            | KP909173              |
| OTU 19 | <i>Corynebacterineae</i>                         | <i>Mycobacterium fortuitum</i>                 | 468         | 100                  | Azadi et al., 2016 [70]             | KX954379              |
| OTU 20 | <i>Rhodanobacter</i> C                           | Uncultured <i>Rhodanobacter</i> sp.            | 468         | 100                  | Unpublished                         | KY445711              |
| OTU 21 | Unidentified <i>Edaphobacter</i> (Order)         | Uncultured bacterium                           | 468         | 100                  | Zeglin et al., 2016 [85]            | KP911732              |
| OTU 22 | <i>Micrococcineae</i>                            | <i>Lysinimonas</i> sp.                         | 468         | 100                  | Liu et al., 2002 [86]               | KT803390              |
| OTU 23 | <i>Poवालibacter</i>                              | Uncultured bacterium                           | 468         | 100                  | Peipoch et al., 2015 [87]           | KT908136              |
| OTU 24 | Unidentified (Family) <i>Rhizomicrobium</i>      | Uncultured bacterium                           | 468         | 100                  | Zeglin et al., 2016 [85]            | KP911577              |
| OTU 25 | <i>Devosia</i>                                   | <i>Devosia</i> sp.                             | 468         | 100                  | Colin et al., 2017 [80]             | KX418822              |
| OTU 26 | <i>Acidocella</i>                                | Uncultured <i>Acidoella</i> sp.                | 468         | 100                  | Unpublished                         | EF016441              |
| OTU 28 | <i>Chitinophaga</i>                              | Uncultured <i>Bacteroidetes</i>                | 468         | 100                  | Zinger et al., 2009 [84]            | FJ569783              |
| OTU 29 | Unidentified <i>Terriglobus</i> (Order)          | Uncultured <i>Granulicella</i> sp.             | 468         | 100                  | Unpublished                         | KR831665              |
| OTU 30 | <i>Afipia</i>                                    | <i>Nitrobacter</i> sp.                         | 468         | 100                  | Unpublished                         | KY117526              |
| OTU 32 | <i>Flavisolibacter</i>                           | Uncultured bacterium                           | 468         | 100                  | Fonseca-García et al., 2016 [88]    | KU539980              |
| OTU 33 | <i>Ferruginibacter</i>                           | Uncultured <i>Sphingobacteriales</i> bacterium | 462         | 99                   | Sun et al., 2012 [89]               | JN541173              |
| OTU 35 | <i>Aminobacter</i>                               | <i>Mesorhizobium ciceri</i>                    | 468         | 100                  | Haskett et al., 2016 [71]           | KX226352              |
| OTU 36 | <i>Burkholderia</i>                              | <i>Burkholderia</i> sp.                        | 468         | 100                  | Colin et al., 2017 [80]             | KX419240              |
| OTU 38 | <i>Pseudonocardineae</i>                         | <i>Pseudonocardia xishanensis</i>              | 470         | 100                  | Zhao et al., 2012 [90]              | NR_108411             |
| OTU 39 | <i>Mesorhizobium</i>                             | <i>Mesorhizobium waimense</i>                  | 468         | 100                  | De Meyer et al., 2015 [91]          | NR_137372             |
| OTU 40 | Unidentified <i>Aridibacter</i> (Order)          | Uncultured bacterium                           | 462         | 99                   | Yin et al., 2015 [92]               | KP784910              |
| OTU 41 | <i>Brevundimonas</i>                             | Uncultured <i>alpha proteobacterium</i>        | 468         | 100                  | Yergeau et al., 2007 [93]           | EF219826              |
| OTU 42 | <i>Nevskia</i>                                   | Uncultured bacterium                           | 468         | 100                  | Zeglin et al., 2016 [85]            | KP912254              |
| OTU 43 | Unidentified (Class) <i>Verrucomicrobia</i> Sub3 | Uncultured bacterium                           | 468         | 100                  | Dunbar et al., 2012 [94]            | JQ366564              |
| OTU 45 | <i>Oleigrimonas</i>                              | Uncultured archaeon                            | 468         | 100                  | Rastogi et al., 2009 [95]           | FJ184749              |
| OTU 46 | <i>Beijerinckia</i>                              | Uncultured <i>Rhizobiales</i>                  | 468         | 99                   | Hodkinson et al., 2012 [96]         | JF814502              |
| OTU 47 | <i>Rhodopseudomonas</i> A                        | Uncultured bacterium                           | 468         | 100                  | Kelly et al., 2010 [97]             | GU219805              |
| OTU 52 | <i>Flaviumibacter</i>                            | Uncultured <i>Bacteroidetes</i>                | 468         | 100                  | Zinger et al., 2009 [84]            | FJ569311              |
| OTU 53 | <i>Romboutsia</i>                                | <i>Romboutsia timonensis</i>                   | 466         | 100                  | Ricaboni et al., 2016 [98]          | NR_1447               |
| OTU 54 | <i>Phenylobacterium</i>                          | Uncultured bacterium                           | 462         | 99                   | Zeglin et al., 2016 [85]            | KP904793              |
| OTU 55 | <i>Nitrobacter</i>                               | Uncultured bacterium                           | 468         | 100                  | Faltesek and Cepicka, 2012 [99]     | JQ217878              |
| OTU 56 | Unidentified (Family) <i>Rhizomicrobium</i>      | Uncultured <i>alpha proteobacterium</i>        | 468         | 100                  | Chen et al., 2014 [100]             | KF182818              |
| OTU 61 | <i>Flavisolibacter</i>                           | <i>Flavitalea</i> sp.                          | 468         | 100                  | Unpublished                         | KX146487              |
| OTU 62 | WPS-1 “ <i>Genera incertae sedis</i> ” (Class)   | Uncultured bacterium                           | 446         | 98                   | Unpublished                         | JQ711725              |
| OTU 63 | Unidentified (Class) <i>Acidobacteria</i> Gp1    | Uncultured bacterium                           | 451         | 99                   | Zeglin et al., 2016 [85]            | KP913651              |
| OTU 68 | <i>Parvibaculum</i>                              | Sediment bacterium                             | 468         | 100                  | Hilyard et al., 2008 [101]          | EU167984              |
| OTU 69 | <i>Rhodopseudomonas</i> B                        | <i>Rhodopseudomonas</i> sp.                    | 468         | 100                  | Ganzert et al., 2014 [102]          | KF974286              |
| OTU 73 | <i>Acidicoccus</i>                               | Uncultured bacterium                           | 462         | 99                   | Zeglin et al., 2016 [85]            | KP929003              |
| OTU 74 | <i>Aquisphaera</i> B                             | Uncultured bacterium                           | 464         | 99                   | Fonseca-Garcia et al., 2016 [88]    | KU542490              |
| OTU 76 | <i>Micrococcineae</i>                            | <i>Leifsonia lichenia</i>                      | 468         | 100                  | Al-Sadi et al., 2016 [103]          | KU220847              |
| OTU 77 | Unidentified (Class) <i>Acidobacteria</i> Gp3    | Uncultured <i>Acidobacteria</i>                | 468         | 99                   | Unpublished                         | KR844218              |
| OTU 78 | <i>Ferruginibacter</i>                           | Uncultured bacterium                           | 468         | 100                  | Zeglin et al., 2016 [85]            | KP906926              |
| OTU 82 | <i>Dyadobacter</i>                               | <i>Dyadobacter</i> sp.                         | 468         | 100                  | Colin et al., 2017 [80]             | KX418930              |
| OTU 84 | <i>Vampirovibrio</i> A                           | Uncultured <i>Vampirovibrio</i> sp.            | 468         | 100                  | Unpublished                         | KR839383              |
| OTU 85 | <i>Pectobacterium</i>                            | <i>Pectobacterium carotovorum</i>              | 468         | 100                  | Al-Kharousi et al., 2016 [104]      | KR265429              |

|         |                                       |                                     |     |     |                                   |          |
|---------|---------------------------------------|-------------------------------------|-----|-----|-----------------------------------|----------|
| OTU 89  | <i>Lacibacterium</i>                  | Uncultured <i>Rhodospirillaceae</i> | 468 | 100 | Lesaulnier et al., 2008 [105]     | EF018478 |
| OTU 92  | <i>Nitrospira</i>                     | Uncultured <i>Nitrospira</i> sp.    | 468 | 100 | Zhao et al., 2015 [106]           | KP890815 |
| OTU 98  | <i>Staphylococcus</i>                 | <i>Staphylococcus epidermidis</i>   | 468 | 100 | Sepulveda et al., 2016 [107]      | KX108950 |
| OTU 108 | <i>Vampirovibrio B</i>                | Uncultured <i>Vampirovibrio</i> sp. | 451 | 99  | Unpublished                       | KR836560 |
| OTU 113 | <i>Haliangiaceae</i>                  | Uncultured soil bacterium           | 468 | 100 | Lueders et al., 2006 [108]        | DQ643693 |
| OTU 116 | <i>Pseudolabrys</i>                   | Uncultured alpha proteobacterium    | 468 | 100 | Sun et al., 2012 [89]             | JN541152 |
| OTU 129 | <i>Aquisphaera A</i>                  | Uncultured bacterium                | 464 | 99  | Unpublished                       | KY256905 |
| OTU 136 | <i>Propionibacterineae</i>            | <i>Marmoricola</i> sp.              | 468 | 100 | Unpublished                       | LN833253 |
| OTU 138 | Unidentified <i>Acidipila</i> (Order) | Uncultured <i>Acidobacterium</i>    | 468 | 100 | Sanchez-Andrea et al., 2011 [109] | HQ730658 |
| OTU 139 | <i>Candidimonas</i>                   | <i>Parapusillimonas granuli</i>     | 462 | 99  | Auffret et al., 2015 [110]        | KM047480 |
| OTU 140 | <i>Ewingella</i>                      | <i>Ewingella</i> sp.                | 468 | 100 | Xie et al., 2017 [111]            | KX378962 |
| OTU 276 | <i>Herbaspirillum</i>                 | <i>Herbaspirillum hiltneri</i>      | 451 | 99  | Poosakkannu et al., 2015 [112]    | KJ529095 |
| OTU 373 | <i>Sediminibacterium</i>              | Uncultured bacterium                | 457 | 99  | Egert et al., 2010 [113]          | FN401290 |
| OTU 380 | <i>Mucilaginibacter C</i>             | Uncultured <i>Bacteroidetes</i>     | 451 | 99  | Zinger et al., 2009 [84]          | FJ569664 |
| OTU 801 | <i>Mizugakiibacter</i>                | Uncultured <i>Xanthomonadaceae</i>  | 440 | 98  | Ceja-Navarro et al., 2010 [114]   | FJ889338 |

**Table S2.** National Centre for Biotechnology Information (NCBI) Basic Local Alignment Search Tool (BLAST) best matches for ITS OTUs. See main text for full references.

| OTU ID  | UTAX Taxonomy                                               | BLAST "Best Hit" Taxonomy                                    | BLAST score | BLAST Similarity (%) | BLAST "Best Hit" Reference (If Available) | "Best Hit" Genbank ID |
|---------|-------------------------------------------------------------|--------------------------------------------------------------|-------------|----------------------|-------------------------------------------|-----------------------|
| OTU 1   | Unidentified <i>Tremellomycetes</i> (Class)                 | <i>Trichosporon porosum</i>                                  | 416         | 99                   | Jimenez et al., 2014 [115]                | KF285994              |
| OTU 2   | <i>Orpinomyces</i>                                          | Uncultured fungus                                            | 512         | 98                   | Unpublished                               | KU000514              |
| OTU 3   | <i>Exophiala</i>                                            | <i>Exophiala equina</i>                                      | 555         | 99                   | Unpublished                               | JF747078              |
| OTU 5   | <i>Trichoderma</i>                                          | <i>Trichoderma lixii</i>                                     | 573         | 99                   | Anees et al., 2010 [116]                  | HM176572              |
| OTU 6   | <i>Candida</i>                                              | <i>Candida sake</i>                                          | 366         | 99                   | Unpublished                               | KY106736              |
| OTU 7   | <i>Tyromyces</i>                                            | <i>Trypanosoma evansi</i> -Tyropanosome                      | 124         | 99                   | Wen et al., 2016 [117]                    | KU552351              |
| OTU 10  | Unidentified <i>Nectriaceae</i> (Family)                    | <i>Fusarium oxysporum</i>                                    | 477         | 100                  | Unpublished                               | KT241034              |
| OTU 11  | Unidentified <i>Sordariomycetes</i> (Class)                 | Uncultured fungus                                            | 488         | 100                  | Unpublished                               | JX364633              |
| OTU 13  | Unidentified <i>Fungi</i> (Kingdom)                         | Uncultured eukaryote                                         | 154         | 98                   | Unpublished                               | KY690346              |
| OTU 14  | <i>Serendipita</i>                                          | Uncultured fungus                                            | 124         | 99                   | Taylor et al., 2008 [118]                 | EU292563              |
| OTU 15  | Unidentified <i>Basidiomycota</i> (Phylum)                  | Uncultured fungus                                            | 311         | 91                   | Unpublished                               | KU000525              |
| OTU 16  | Unidentified <i>Fungi</i> (Kingdom)                         | <i>Fungal</i> <sup>sp.</sup><br>NLEndoHerit_025_2008N1-27-3H | 488         | 99                   | Lamit et al., 2014 [119]                  | JX978254              |
| OTU 17  | <i>Penicillium</i>                                          | <i>Penicillium corylophilum</i>                              | 520         | 99                   | Bukovska et al., 2010 [120]               | GU566277              |
| OTU 19  | <i>Devriesia</i>                                            | Uncultured fungus                                            | 455         | 100                  | Adams et al., 2013 [121]                  | KF221844              |
| OTU 20  | <i>Pulchromyces</i>                                         | <i>Metschnikowia matae</i> var. <i>matae</i>                 | 122         | 96                   | De Oliveira Santos et al., 2015 [122]     | KR779914              |
| OTU 21  | <i>Pestalotiopsis</i>                                       | <i>Pestalotiopsis maculans</i>                               | 462         | 99                   | Unpublished                               | KX610327              |
| OTU 22  | Unidentified <i>Helotiales</i> (Order)                      | Uncultured fungus                                            | 479         | 100                  | Cordier et al., 2012 [123]                | JN906781              |
| OTU 23  | Unidentified <i>Nectriaceae</i> (Family)                    | Uncultured <i>Ascomycota</i>                                 | 475         | 99                   | Kartzinel et al., 2013 [124]              | JX998704              |
| OTU 24  | <i>Malassezia</i>                                           | Uncultured <i>Malassezia</i>                                 | 671         | 99                   | Unpublished                               | KY430579              |
| OTU 25  | Unidentified <i>Fungi</i> (Kingdom)                         | Uncultured <i>Basidiomycota</i>                              | 128         | 99                   | Unpublished                               | KU000462              |
| OTU 26  | <i>Guehomyces</i>                                           | <i>Tausonia pullulans</i>                                    | 483         | 99                   | Unpublished                               | KY105583              |
| OTU 27  | Unidentified <i>Pleosporales</i> (Order)                    | <i>Alternaria tenuissima</i>                                 | 503         | 99                   | Unpublished                               | KX674653              |
| OTU 28  | <i>Aspergillus</i>                                          | <i>Aspergillus pseudoglaucus</i>                             | 462         | 99                   | Unpublished                               | KX610153              |
| OTU 30  | Unidentified <i>Sporidiobolales</i> (Family Incertae sedis) | <i>Sporidiobolales</i> sp. LM531                             | 479         | 99                   | Unpublished                               | EF060822              |
| OTU 32  | Unidentified <i>Sporidiobolales</i> (Order)                 | Uncultured <i>Sporobolomyces</i>                             | 479         | 99                   | Unpublished                               | KT334689              |
| OTU 34  | <i>Malassezia</i>                                           | <i>Malassezia restricta</i>                                  | 588         | 99                   | Alaei et al., 2009 [125]                  | EU400587              |
| OTU 35  | Unidentified <i>Fungi</i> (Kingdom)                         | Uncultured fungus                                            | 451         | 89                   | Scoble et al., 2014 [126]                 | KF577829              |
| OTU 37  | <i>Sporobolomyces</i>                                       | Uncultured fungus                                            | 424         | 88                   | Waldrop et al., 2006 [127]                | DQ420716              |
| OTU 63  | <i>Monographella</i>                                        | <i>Microdochium</i> sp. 00019                                | 460         | 99                   | Carter et al., 1999 [131]                 | AJ246155              |
| OTU 131 | Unidentified <i>Fungi</i> (Kingdom)                         | Uncultured fungus                                            | 327         | 96                   | Unpublished                               | KU000475              |
| OTU 226 | Unidentified <i>Tremellomycetes</i> (Class)                 | <i>Trichosporon porosum</i> strain 2t1F                      | 407         | 99                   | Jiménez et al., 2012 [115]                | KF285994              |

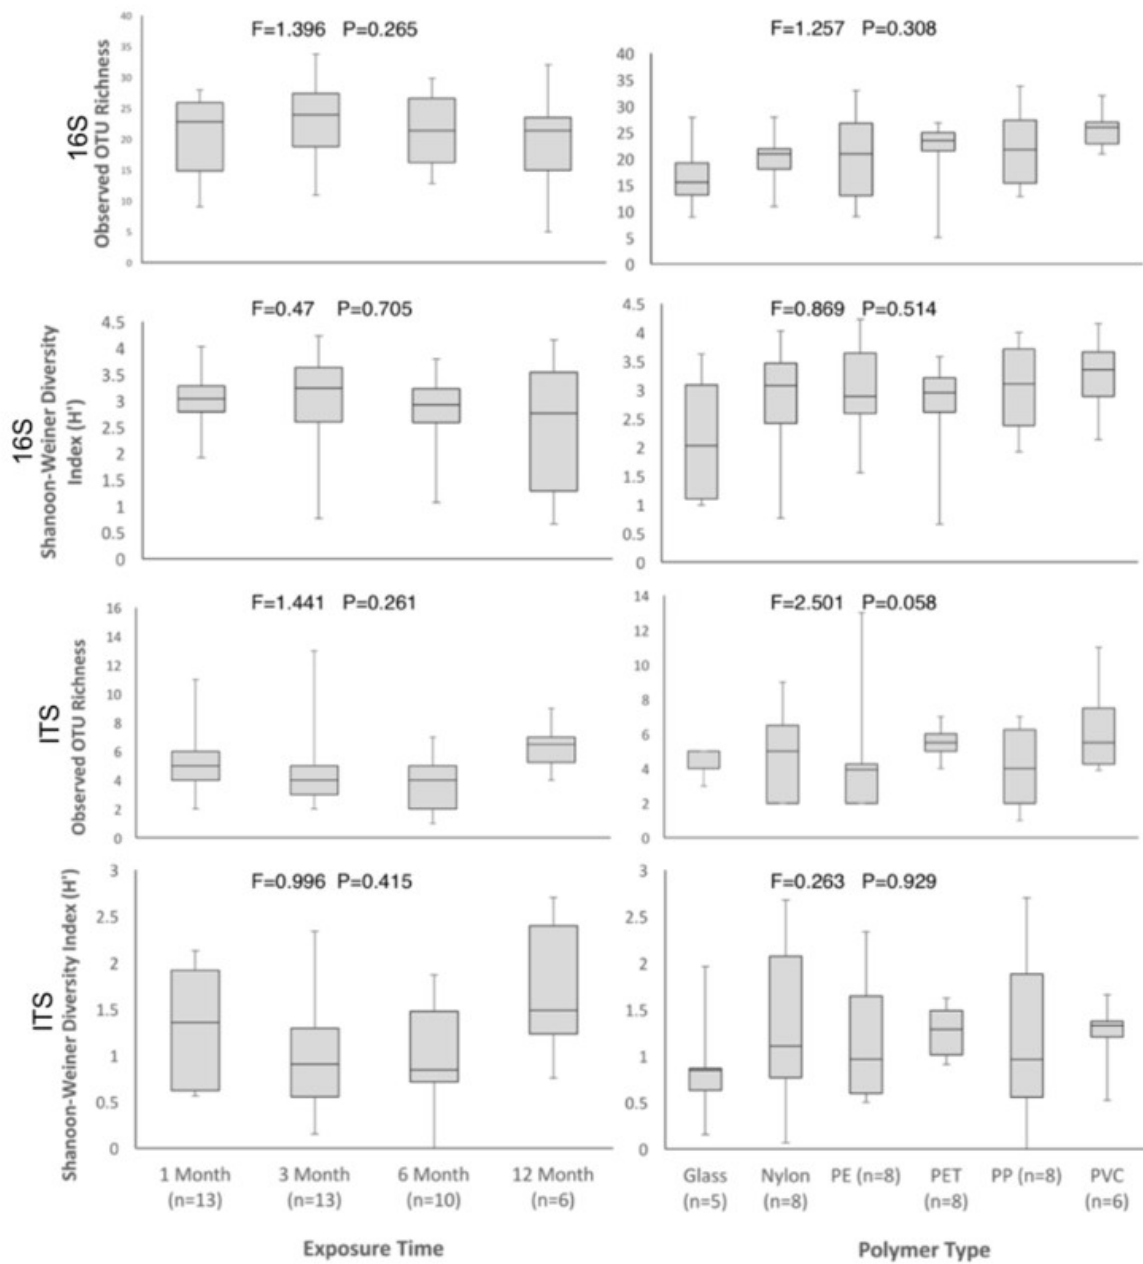

**Figure S3.** Box plots of bacterial or fungal OTU richness and Shannon-Wiener diversity for both polymer type and time. ANOVA F and *p* values show no significant differences within each tested box plot data (randomly subsampled to highest possible equal level of *n*). In the case of graph F where the *p* value indicates near-significance, post-hoc Tukey's HSC test proved no significant differences between any variables.

## Results

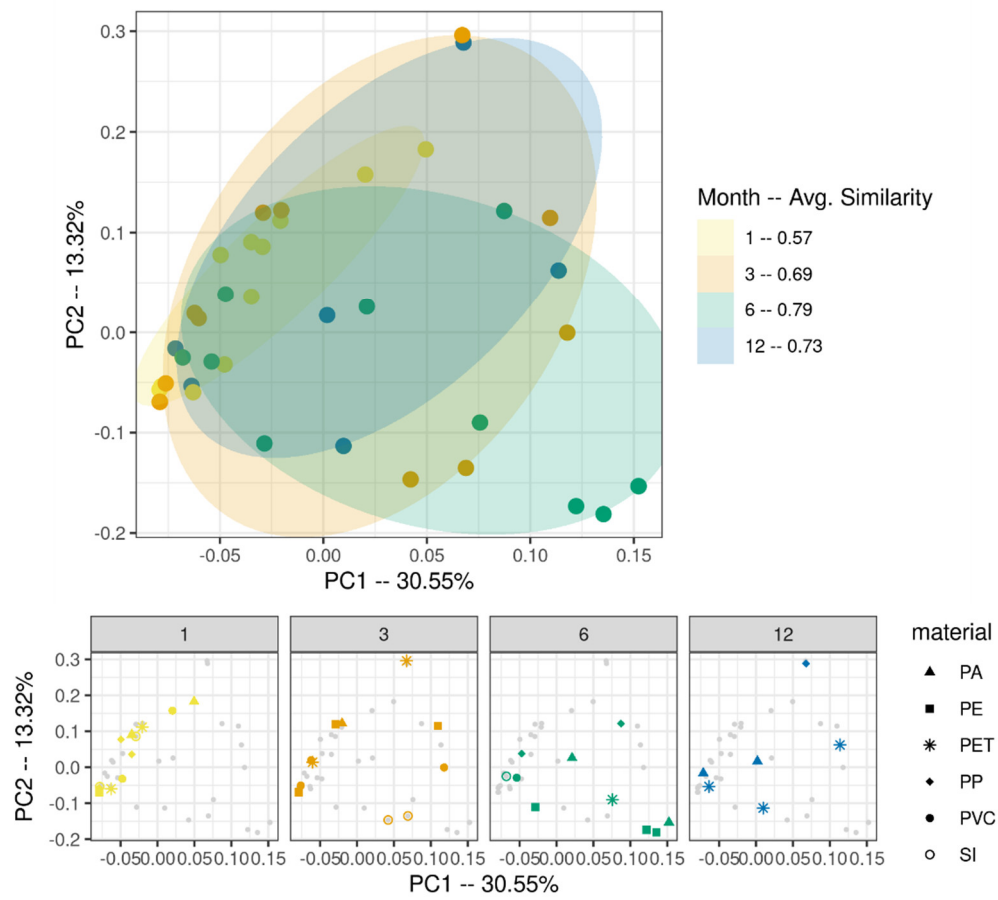

**Figure S4.** Principle coordinate analyses of ITS data based on Bray-Curtis dissimilarity matrix. The top plot shows the overall dataset while the bottom plots give details on polymer types.
